# Supplementary material
Source: PubMed Central journal article supplement (PMC7007330)
Supplement: NIHMS1053627-supplement-Supp_info.pdf [file NIHMS1053627-supplement-Supp_info.pdf]

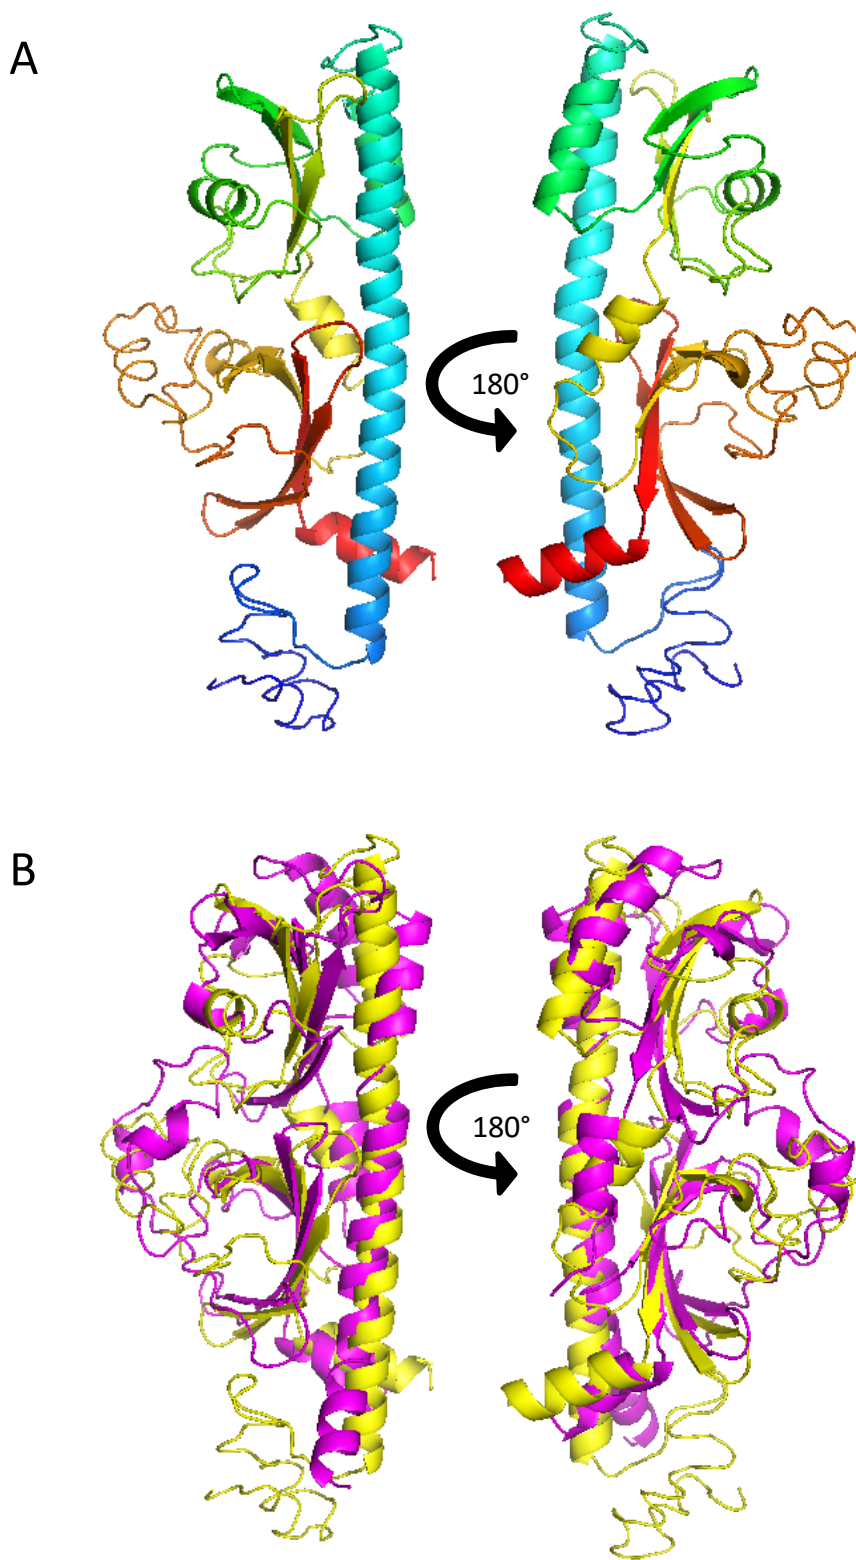

**Figure S1. I-TASSER model of RsbU<sub>1-315</sub> shares structural similarity to periplasmic domain RsbU<sub>45-313</sub> crystal structure. A)** I-TASSER protein structure model with residues 1 through 315 of *C. trachomatis* RsbU. **B)** Structure overlay of RsbU<sub>45-313</sub> crystal structure (magenta) and I-TASSER model (yellow). Structure comparison has Z-score of 14.4 and a RMSD of 4.0 Å.

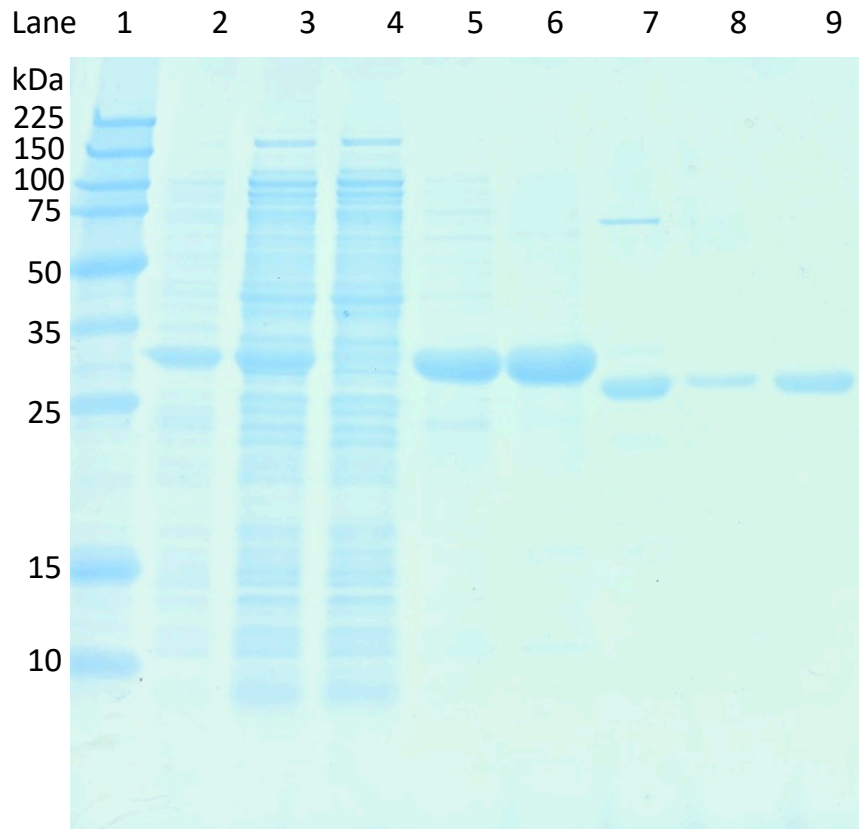

**Figure S2. SDS-PAGE gel showing purification of RsbU<sub>45-313</sub>.** Lane 1, protein marker; lane 2, lysate supernatant; lane 3, lysate pellet; lane 4, IMAC flow-through; lane 5, IMAC elution; lane 6, post-buffer exchange; lane 7, post-TEV protease treatment; Lane 8, post-reverse nickel column; lane 9, SEC column peak fraction.

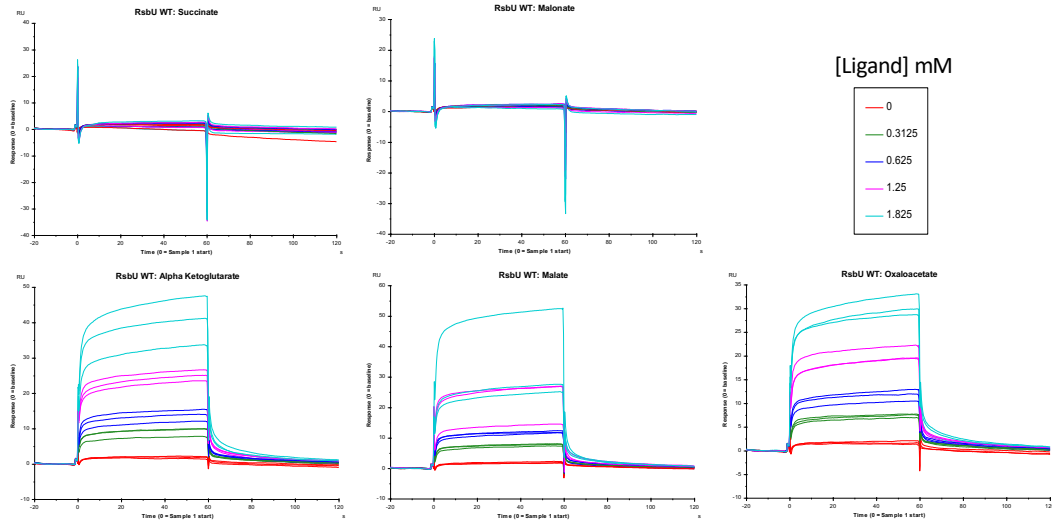

**Figure S3. SPR dose-dependent binding curves.** Alpha-ketoglutarate, malate, and oxaloacetate show dose-dependent binding to RsbU<sub>45-313</sub>, while succinate and malonate, the ligands found to bind to DctB, do not appear to be binding by SPR.

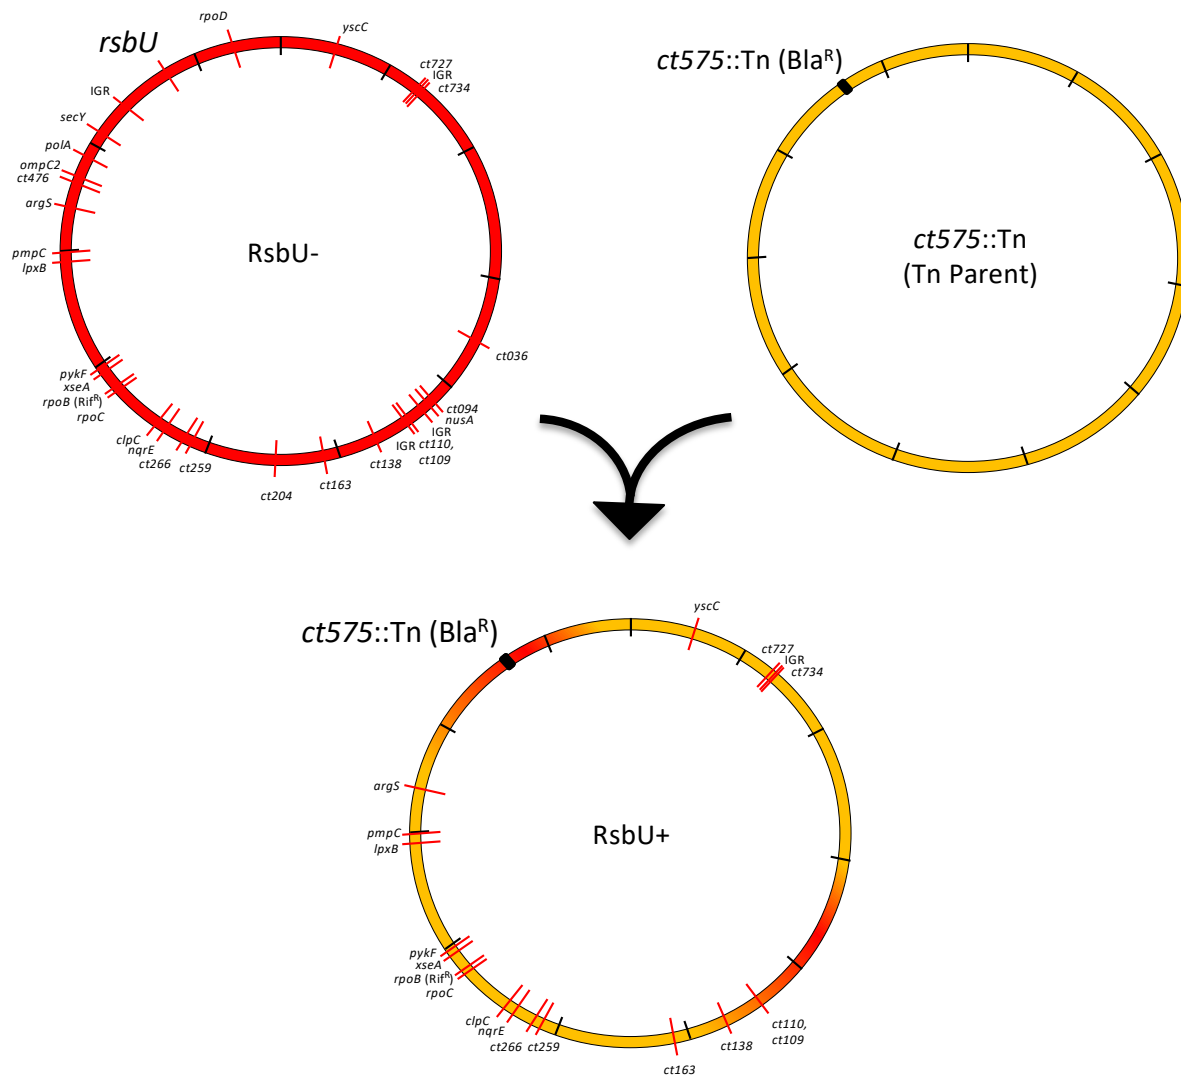

**Figure S4. Chromosome schematic of cross between RsbU\* EMS strain and *ct575::Tn* strain to create the complemented RsbU+ strain that retains the majority of the other SNPs induced by EMS mutagenesis.** The *ct575::Tn* strain contains a beta-lactamase resistance gene in the transposon, while the RsbU\* has a SNP in the *rpoB* gene that incurs rifampicin resistance. Dual selection with ampicillin and rifampicin was utilized to select for recombinants that retained the RsbU\* strain backbone but a wild-type version of the *rsbU* gene. The red region on the RsbU+ chromosome represents the region of recombination between the genomes confirmed by PCR of the SNPs present in the RsbU\* strain. In addition to the restoration of the *rsbU* gene, the RsbU+ strain restores three other SNPs close to the position of the transposon: two in coding regions for *secY* and *polA*; and one in an intergenic region (IGR).



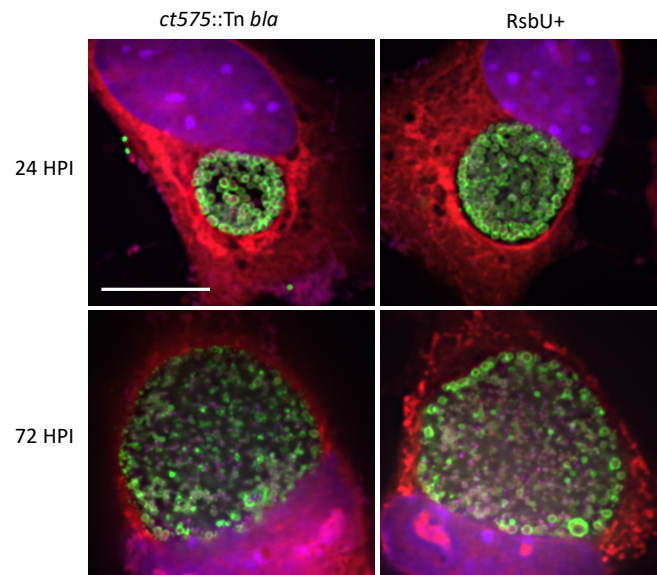

**Figure S5. Immunofluorescent microscopy of *C. trachomatis* ct575::Tn parent strain and RsbU+ complemented strain.** At 24 and 72 hours post-infection, the RsbU+ complemented strain does not appear to be phenotypically different from the Tn parent strain.

**Table S1.** Top structural homologs of RsbU<sub>1-315</sub> I-TASSER model.

| <b>Protein Name : Ligand<br/>Organism</b>     | <b>Z-score</b> | <b>Protein<br/>Description<sup>a</sup></b> | <b>Best Match<br/>PDB code</b> |
|-----------------------------------------------|----------------|--------------------------------------------|--------------------------------|
| PctB:L-Arginine<br><i>Pseudomonas</i>         | 21.0           | Methyl-accepting<br>chemotaxis protein     | 5lt9 <sup>b</sup>              |
| Tlp3<br><i>Campylobacter</i>                  | 20.0           | Methyl-accepting<br>chemotaxis protein     | 4wy9 <sup>b</sup>              |
| mmHK1S-Z3<br><i>Methanosarcina</i>            | 19.6           | Histidine kinase sensor<br>protein         | 3lib                           |
| Mlp24:Asparagine<br><i>Vibrio</i>             | 19.4           | Methyl-accepting<br>chemotaxis protein     | 6ior                           |
| McpX: Proline betaine<br><i>Sinorhizobium</i> | 18.9           | Methyl-accepting<br>chemotaxis protein     | 6d8v                           |
| TlpQ:Histamine<br><i>Pseudomonas</i>          | 18.7           | Methyl-accepting<br>chemotaxis protein     | 6fu4                           |
| soHK1S-Z6<br><i>Psuedomonas</i>               | 18.2           | Histidine kinase                           | 3lic                           |
| rpHK1S-Z16<br><i>Shewanella</i>               | 17.5           | Histidine kinase sensor<br>protein         | 3lif <sup>b</sup>              |
| TlpA<br><i>Helicobacter</i>                   | 17.5           | Methyl-accepting<br>chemotaxis protein     | 6e0a                           |
| Dsm5692<br><i>Desulfohalbium</i>              | 17.0           | Histidine kinase sensor<br>protein         | 5ere <sup>b</sup>              |
| DctB:malonic acid<br><i>Sinorhizobium</i>     | 16.7           | Histidine kinase sensor<br>protein         | 2zbb <sup>b</sup>              |
| Tlp3:Isoleucine<br><i>Campylobacter</i>       | 16.7           | Methyl-accepting<br>chemotaxis protein     | 4xmq <sup>b</sup>              |
| LEP15460<br><i>Leptospira</i>                 | 16.6           | Methyl-accepting<br>chemotaxis protein     | 6pzj                           |
| DctB:Succinate<br><i>Vibrio</i>               | 16.1           | Histidine kinase sensor<br>protein         | 3by9 <sup>b</sup>              |
| vpHK1S-Z8:Sulfate<br><i>Vibrio</i>            | 16.0           | Histidine kinase sensor<br>protein         | 3lid <sup>b</sup>              |

<sup>a</sup> All structural homologs are periplasmic-localized, ligand-binding regions (chemosensors).

<sup>b</sup> Protein structures also similar to RsbU crystal structure following DALI search.

**Table S2.** Non-redundant structural matches for RsbU<sub>45-313</sub> from *C. trachomatis*.

| Protein Name : Ligand<br>Organism               | Z-score | RMSD (Å) | % ID<br>to RsbU <sub>45-313</sub> | % ID<br>to binding pocket<br>(residues 111-189) | Best Match<br>PDB code |
|-------------------------------------------------|---------|----------|-----------------------------------|-------------------------------------------------|------------------------|
| DctB:succinate<br><i>V. cholerae</i>            | 17.8    | 3.2      | 13                                | 6                                               | 3by9                   |
| DctB:malonate/succinate<br><i>S. meliloti</i>   | 16.5    | 3.7      | 12                                | 0                                               | 3e4p                   |
| PctA:L-Met<br><i>P. aeruginosa</i>              | 15.1    | 3.71     | 12                                | 0                                               | 5ltx                   |
| vpHK1S-Z8:acetate<br><i>V. parahaemolyticus</i> | 14.5    | 3.8      | 9                                 | 0                                               | 2pj7                   |
| PctB:L-Gln<br><i>P. aeruginosa</i>              | 14.3    | 3.5      | 11                                | 0                                               | 5lto                   |
| Tlp3:isoleucine<br><i>C. jejuni</i>             | 13.8    | 4        | 15                                | 16                                              | 4xmq                   |
| Mlp37:alanine<br><i>V. cholerae</i>             | 13.8    | 4.4      | 11                                | 0                                               | 5avf                   |
| PctC:GABA<br><i>P. aeruginosa</i>               | 13.8    | 3.5      | 12                                | 0                                               | 5ltv                   |
| Histidine kinase<br><i>R. palustris</i>         | 13.5    | 4.1      | 9                                 | 8                                               | 3lif                   |
| McpN<br><i>V. cholerae</i>                      | 13.5    | 4.1      | 11                                | 0                                               | 3c8c                   |
| KinD:pyruvate<br><i>B. subtilis</i>             | 13.2    | 3.8      | 12                                | 0                                               | 4jgo                   |
| Dret_0059:cysteine<br><i>D. retbaense</i>       | 13      | 4.9      | 11                                | 0                                               | 5ere                   |
| Tlp1<br><i>C. jejuni</i>                        | 12.8    | 4.4      | 13                                | 0                                               | 4wy9                   |
| AHK4:isoentyladenine<br><i>A. thaliana</i>      | 11.5    | 4        | 11                                | 5                                               | 3t4t                   |

**Table S3.** Potential ligands tested for RsbU<sub>45-313</sub> binding.

| Ligand                               | Compound                                        | Mass in Daltons |
|--------------------------------------|-------------------------------------------------|-----------------|
| Succinate                            | Sodium Succinate Dibasic Hexahydrate            | 116             |
| Malonate                             | Sodium Malonate Dibasic Monohydrate             | 102             |
| Glutamate                            | L-Glutamic Acid monosodium salt monohydrate     | 147             |
| Alpha-ketoglutarate (2-oxoglutarate) | Alpha-Ketoglutaric Acid                         | 146             |
| Fumarate                             | Fumaric Acid                                    | 114             |
| Oxaloacetate                         | Oxaloacetic Acid                                | 130             |
| Malate                               | D-Malic Acid                                    | 132             |
| 2- phosphoglycerate                  | L-2-Phosphoglyceric Acid Disodium Salt Hydrate  | 186             |
| Glucose                              | D-(+) Glucose                                   | 180             |
| Pyruvate                             | Sodium Pyruvate                                 | 87              |
| Phosphoenolpyruvate                  | Phospho(enol)pyruvic Acid Monopotassium Salt    | 165             |
| ATP                                  | Adenosine 5'-triphosphate disodium salt hydrate | 507             |
| Mannitol                             | Mannitol                                        | 182             |
| Lysine                               | L-Lysine                                        | 146             |
| Isoleucine                           | L-isoleucine                                    | 131             |
| Succinyl-CoA                         | Succinyl coenzyme A sodium salt                 | 867             |
| Pyridoxine                           | Pyridoxine, Vitamin B6                          | 169             |
| Glucosamine                          | Glucosamine hydrochloride                       | 179             |
| D-Mannose                            | D-(+)-Mannose                                   | 180             |
| 5-hydroxy-L-lysine                   | DL-5-hydroxylysine hydrochloride                | 162             |
| D-talose                             | D-(+)-talose                                    | 180             |
| D-galactose                          | D-(+)-galactose                                 | 180             |
| D-gulose                             | D-(+)-gulose <sup>1</sup>                       | 180             |
| D-idose                              | D-idose <sup>1</sup>                            | 180             |
| 7-8-dihydroneopterin                 | 7-8-dihydroneopterin <sup>2</sup>               | 255             |
| D-allose                             | D-allose <sup>1</sup>                           | 180             |

All compounds were acquired from Sigma Aldrich unless otherwise specified.

<sup>1</sup> Carbosynth (United Kingdom)

<sup>2</sup> Toronto Research Chemicals (Canada)

**Table S4.** Average  $\Delta T_m$  of RsbU<sub>45-313</sub> with potential ligands.

| Ligand                 | Concentration (mM)   |      |                      |      |                      |      |                      |      |
|------------------------|----------------------|------|----------------------|------|----------------------|------|----------------------|------|
|                        | 1.25                 |      | 2.5                  |      | 5                    |      | 10                   |      |
|                        | Average $\Delta T_m$ | SD   |
| Alpha-ketoglutarate    |                      |      |                      |      |                      |      |                      |      |
| Biological Replicate 1 | -0.16                | 0.03 | -0.17                | 0.07 | 0.15                 | 0.17 | 1.64*                | 0.33 |
| Biological Replicate 2 | -0.05                | 0.11 | 0.11                 | 0.42 | 1.42*                | 0.38 | 3.16*                | 0.10 |
| Malate                 |                      |      |                      |      |                      |      |                      |      |
| Biological Replicate 1 | 0.02                 | 0.01 | 0.21                 | 0.06 | 0.52*                | 0.07 | 2.35*                | 0.16 |
| Biological Replicate 2 | 0.33                 | 0.20 | 0.28                 | 0.06 | 1.45*                | 0.87 | 1.64*                | 0.11 |
| Oxaloacetate           |                      |      |                      |      |                      |      |                      |      |
| Biological Replicate 1 | -0.05                | 0.05 | 0.05                 | 0.07 | 0.27                 | 0.07 | 1.75*                | 0.27 |
| Biological Replicate 2 | -0.02                | 0.03 | 0.11                 | 0.51 | -1.33                | 0.25 | 0.29                 | 0.20 |
| Malonate               |                      |      |                      |      |                      |      |                      |      |
| Biological Replicate 1 | -0.09                | 0.03 | -0.24                | 0.02 | -0.27                | 0.04 | -0.59                | 0.09 |
| Biological Replicate 2 | -1.27                | 1.19 | 0.04                 | 0.25 | 0.10                 | 0.49 | -0.83                | 0.14 |
| Succinate              |                      |      |                      |      |                      |      |                      |      |
| Biological Replicate 1 | 0.03                 | 0.14 | -0.25                | 0.04 | -0.30                | 0.03 | -0.57                | 0.01 |
| Biological Replicate 2 | -0.05                | 0.34 | -0.25                | 0.21 | -1.50                | 0.78 | -0.20                | 0.34 |

Values in green are positive temperature shifts. Technical triplicates were performed for each biological replicate.

\* p-value < 0.05 by two way ANOVA with Dunnett's multiple comparisons test post hoc

Table S5. SNPs in RsbU\* determined by Whole-Genome Sequencing.

| Location (bp)    | Locus Tag    | Gene function                                                                  | Change             | Coverage at site   | Possible Effect                                                                 |
|------------------|--------------|--------------------------------------------------------------------------------|--------------------|--------------------|---------------------------------------------------------------------------------|
| 52,232           | CT674        | YscC, type II secretion system protein                                         | G664W              | 306x, 97.4%        | Loses possible turn                                                             |
| 119,402          | CT727        | zntA, metal transporting ATPase                                                | silent, S102       | 200x, 98.5%        | N/A                                                                             |
| 133,223          | IGR          | N/A                                                                            | N/A                | 226x, 96%          | Likely in the promotor region for ribA, may effect expression                   |
| 137,588          | CT734        | lipoprotein                                                                    | silent, P218       | 208x, 95.2%        | N/A                                                                             |
| <b>363,948</b>   | <b>CT036</b> | <b>hypothetical protein, putative inc</b>                                      | <b>G182S</b>       | <b>291x, 96.9%</b> | <b>likely in a beta strand facing host cytosol, no obvious effect</b>           |
| <b>431,642</b>   | <b>CT094</b> | <b>tRNA pseudouridine synthase B</b>                                           | <b>silent, L62</b> | <b>439x, 97.3%</b> | <b>N/A</b>                                                                      |
| <b>435,453</b>   | <b>CT097</b> | <b>nusA, transcription termination/antitermination protein</b>                 | <b>A247V</b>       | <b>411x, 98.5%</b> | <b>Likely in beta strand, no obvious effect</b>                                 |
| <b>440,207</b>   | <b>IGR</b>   | <b>N/A</b>                                                                     | <b>N/A</b>         | <b>543x, 98.3%</b> | <b>Between 2 diverging genes, potential expression effects</b>                  |
| 448,523          | CT109        | hypothetical protein                                                           | A37V               | 420x, 97.9%        | no obvious effects                                                              |
| 449,796          | CT110        | GroEL, chaperonin                                                              | silent, L200       | 385x, 96.9%        | N/A                                                                             |
| <b>452,840</b>   | <b>IGR</b>   | <b>N/A</b>                                                                     | <b>N/A</b>         | <b>443x, 97.7%</b> | <b>Between divergent genes, possible small RNA or regulatory region</b>         |
| 477,508          | CT138        | microsomal dipeptidase                                                         | P70S               | 382x, 98.4%        | potential lengthening of a turn region                                          |
| 509270           | CT163        | hypothetical protein                                                           | Q204*              | 688x, 98.75        | Major truncation event, contains about 1/3 extracellular domain, in PZ          |
| <b>547175</b>    | <b>CT204</b> | <b>ybhI, sodium:sulfate symporter</b>                                          | <b>S31F</b>        | <b>455x, 98.2%</b> | <b>no obvious effect, in extracellular domain</b>                               |
| <b>609746</b>    | <b>CT259</b> | <b>protein phosphatase</b>                                                     | <b>G105E</b>       | <b>583x, 99.1%</b> | <b>possible addition of a-helix, not in active site</b>                         |
| 616,827          | CT266        | hypothetical protein                                                           | silent, E105       | 572x, 97.0%        | N/A                                                                             |
| <b>630,626</b>   | <b>CT281</b> | <b>nqrE, Na(+)-translocating NADH-quinone reductase subunit E</b>              | <b>silent, L3</b>  | <b>533x, 97.7%</b> | <b>N/A</b>                                                                      |
| 637,039          | CT286        | clpC, ATP-dependent Clp protease ATP-binding subunit                           | R204C              | 631x, 98.9%        | no obvious effects                                                              |
| 638,353          | CT286        | clpC, ATP-dependent Clp protease ATP-binding subunit                           | F642L              | 455x, 98.0%        | no obvious effects                                                              |
| 672,564          | CT314        | rpoC, DNA-directed RNA polymerase subunit beta'                                | E195K              | 394x, 97.7%        | no obvious effects                                                              |
| 675,519          | CT315        | rpoB, DNA-directed RNA polymerase subunit beta                                 | H471Y              | 403x, 98.5%        | no obvious effects                                                              |
| 689,582          | CT329        | xseA, exodeoxyribonuclease VII large subunit                                   | silent, Y279       | 486x, 99.0%        | N/A                                                                             |
| 693,265          | CT332        | pykF, pyruvate kinase                                                          | S158N              | 372x, 98.7%        | possible introduction of a turn                                                 |
| 789,731          | CT411        | lpxB, lipid-A-disaccharide synthase                                            | L601F              | 583x, 97.4%        | no obvious effects                                                              |
| 798,820          | CT414        | pmpC                                                                           | G157E              | 395x, 97.7%        | possible shorter helix                                                          |
| 847,452          | CT454        | argS, arginine--tRNA ligase                                                    | P412L              | 341x, 97.55        | no obvious effects                                                              |
| <b>869381</b>    | <b>CT476</b> | <b>hypothetical protein, ywqK antitoxin module subunit domain (E=3.23e-57)</b> | <b>C8Y</b>         | <b>293x, 97.3%</b> | <b>maybe interferes with predicted signal cleavage site, interrupts a-helix</b> |
| <b>872,210</b>   | <b>CT478</b> | <b>oppC2, oligopeptide ABC transporter permease</b>                            | <b>R127W</b>       | <b>429x, 97.9%</b> | <b>no obvious effects</b>                                                       |
| <b>888,891</b>   | <b>CT493</b> | <b>poIA, DNA polymerase I</b>                                                  | <b>G310E</b>       | <b>394x, 98.7%</b> | <b>possibly extends helix</b>                                                   |
| <b>906,093</b>   | <b>CT510</b> | <b>secY, preprotein translocase subunit</b>                                    | <b>L146F</b>       | <b>522x, 97.5%</b> | <b>no obvious effects</b>                                                       |
| <b>929,717</b>   | <b>IGR</b>   | <b>N/A</b>                                                                     | <b>N/A</b>         | <b>390x, 96.9%</b> | <b>possibly effects expression of CT544</b>                                     |
| <b>1,014,167</b> | <b>CT615</b> | <b>rpoD, sigma-66</b>                                                          | <b>D50N</b>        | <b>443x, 98.6x</b> | <b>no obvious effects</b>                                                       |

Lines in bold indicate those SNPs that maintain the wild-type version of the gene in the RsbU+ complemented strain.
